# Supplementary material
Source: PubMed Central journal article supplement (PMC5546942)
Supplement: NIHMS859872-supplement-supplement_1.pdf [file NIHMS859872-supplement-supplement_1.pdf]

## Supplemental Materials

The experimental tasks used in the current report can be found online at:

Experiment 1- [www.cogfog.com/CM/SDA/](http://www.cogfog.com/CM/SDA/)

Experiment 2- [www.cogfog.com/CM/SDA2/](http://www.cogfog.com/CM/SDA2/)

The OSpan task used in Experiment 1 can be found online at

[www.cogfog.com/CM/OSpan/](http://www.cogfog.com/CM/OSpan/)

Table S1

*Recall probability as a function of study condition and list in Experiment 1*

| Condition         | Collection  | List 1       | List 2       | List 3       | List 4       | List 5       | List 6       | Average   |
|-------------------|-------------|--------------|--------------|--------------|--------------|--------------|--------------|-----------|
| Full attention    | Original    | .34<br>(.12) | .40<br>(.11) | .40<br>(.12) | .39<br>(.12) | .40<br>(.12) | .40<br>(.11) | .39 (.18) |
|                   | Replication | .34<br>(.16) | .35<br>(.15) | .40<br>(.17) | .42<br>(.13) | .41<br>(.16) | .40<br>(.14) | .39 (.22) |
| Divided attention | Original    | .21<br>(.09) | .26<br>(.09) | .30<br>(.14) | .30<br>(.10) | .34<br>(.12) | .30<br>(.09) | .29 (.18) |
|                   | Replication | .15<br>(.10) | .21<br>(.09) | .25<br>(.09) | .28<br>(.10) | .25<br>(.07) | .30<br>(.12) | .24 (.22) |
| Familiar music    | Original    | .31<br>(.13) | .37<br>(.11) | .33<br>(.13) | .33<br>(.12) | .37<br>(.19) | .36<br>(.16) | .35 (.18) |
|                   | Replication | .34<br>(.15) | .32<br>(.09) | .38<br>(.20) | .37<br>(.18) | .40<br>(.17) | .32<br>(.17) | .36 (.22) |
| Unfamiliar music  | Original    | .30<br>(.13) | .35<br>(.13) | .35<br>(.14) | .36<br>(.13) | .36<br>(.14) | .36<br>(.14) | .37 (.18) |
|                   | Replication | .28<br>(.16) | .31<br>(.14) | .35<br>(.16) | .37<br>(.16) | .36<br>(.16) | .35<br>(.16) | .37 (.22) |

*Note.* Standard deviations are presented in parentheses.

Table S2

*Two-level hierarchical generalized linear model of recall performance predicted by Item Value, List, and Study Condition in Experiment 1*

| <b>Fixed effects</b>                                        | <b>Original collection</b> | <b>Replication</b> |
|-------------------------------------------------------------|----------------------------|--------------------|
| Intercept ( $\beta_{00}$ )                                  | -0.53***                   | -0.51***           |
| Predictors of intercept                                     |                            |                    |
| Cond1: Full attention v. Divided attention ( $\beta_{01}$ ) | -0.51***                   | -0.73***           |
| Cond2: Full attention v. Familiar music ( $\beta_{02}$ )    | -0.22                      | -0.18              |
| Cond3: Full attention v. Unfamiliar music ( $\beta_{03}$ )  | -0.07                      | -0.07              |
| Value ( $\beta_{10}$ )                                      | 0.20***                    | 0.12***            |
| Predictors of value                                         |                            |                    |
| Cond1: FA v. DA ( $\beta_{11}$ )                            | -0.05                      | -0.06              |
| Cond2: FA v. FM ( $\beta_{12}$ )                            | -0.02                      | 0.05               |
| Cond3: FA v. UM ( $\beta_{13}$ )                            | -0.05                      | 0.01               |
| List ( $\beta_{20}$ )                                       | 0.02                       | 0.05               |
| Predictors of list                                          |                            |                    |
| Cond1: FA v. DA ( $\beta_{21}$ )                            | 0.05                       | 0.05               |
| Cond2: FA v. FM ( $\beta_{22}$ )                            | 0.003                      | -0.05              |
| Cond3: FA v. UM ( $\beta_{23}$ )                            | 0.01                       | 0.01               |
| List x Value ( $\beta_{30}$ )                               | 0.03**                     | 0.02*              |
| Predictors of list x value                                  |                            |                    |
| Cond1: FA v. DA ( $\beta_{31}$ )                            | -0.0001                    | 0.01               |
| Cond2: FA v. FM ( $\beta_{32}$ )                            | -0.01                      | -0.004             |
| Cond3: FA v. UM ( $\beta_{33}$ )                            | -0.02                      | 0.001              |
| <b>Random effects</b>                                       | <b>Variance</b>            | <b>Variance</b>    |
| Intercept (person-level) ( $r_0$ )                          | 0.19***                    | 0.24***            |
| Value ( $r_1$ )                                             | 0.01***                    | 0.01**             |
| List ( $r_2$ )                                              | 0.03***                    | 0.03***            |
| List x Value ( $r_3$ )                                      | 0.001***                   | 0.001**            |

*Note.* The dependent variable is recall performance coded as 0 (*not recalled*) or 1 (*recalled*). Logit link function was used to address the binary dependent variable. Level 1 models were of the form  $\eta_{ij} = \pi_{0j} + \pi_{1j}$  (Value) +  $\pi_{2j}$  (List) +  $\pi_{3j}$  (List x Value). Level 2 models were of the form  $\pi_{0j} = \beta_{00} + \beta_{01}$  (Cond1) +  $\beta_{02}$  (Cond2) +  $\beta_{03}$  (Cond3) +  $r_{0j}$ ,  $\pi_{1j} = \beta_{10} + \beta_{11}$  (Cond1) +  $\beta_{12}$  (Cond2) +  $\beta_{13}$  (Cond3) +  $r_{1j}$ ,  $\pi_{2j} = \beta_{20} + \beta_{21}$  (Cond1) +  $\beta_{22}$  (Cond2) +  $\beta_{23}$  (Cond3) +  $r_{2j}$ ,  $\pi_{3j} = \beta_{30} + \beta_{31}$  (Cond1) +  $\beta_{32}$  (Cond2) +  $\beta_{33}$  (Cond3) +  $r_{3j}$ . “FA” refers to the Full attention condition; “DA” to Divided attention; “FM” to Familiar music; and “UM” to Unfamiliar music.

\* $p < .05$  \*\* $p < .01$  \*\*\* $p < .001$

Table S3

*Two-level hierarchical generalized linear model of tone detection accuracy and reaction time as predicted by Item Value, List, and Study Condition in Experiment 2*

| <b>Fixed effects</b>                                    | <b>Outcome:<br/>Tone detection<br/>accuracy</b> | <b>Outcome:<br/>Tone detection<br/>reaction time (sec)</b> |
|---------------------------------------------------------|-------------------------------------------------|------------------------------------------------------------|
| Intercept ( $\beta_{00}$ )                              | 0.78***                                         | 0.80***                                                    |
| Predictors of intercept                                 |                                                 |                                                            |
| Cond1: Tone monitoring v. Paired tones ( $\beta_{01}$ ) | -0.01                                           | 0.21***                                                    |
| Cond2: Tone monitoring v. 1back ( $\beta_{02}$ )        | -0.10*                                          | 0.11**                                                     |
| Value ( $\beta_{10}$ )                                  | -0.004                                          | 0.002                                                      |
| Predictors of value                                     |                                                 |                                                            |
| Cond1: TM v. PT ( $\beta_{11}$ )                        | 0.002                                           | -0.001                                                     |
| Cond2: TM v. 1back ( $\beta_{12}$ )                     | -0.0005                                         | -0.004                                                     |
| List ( $\beta_{20}$ )                                   | 0.003                                           | -0.02**                                                    |
| Predictors of list                                      |                                                 |                                                            |
| Cond1: TM v. PT ( $\beta_{21}$ )                        | 0.03                                            | 0.01                                                       |
| Cond2: TM v. 1back ( $\beta_{22}$ )                     | 0.02                                            | -0.01                                                      |
| List x Value ( $\beta_{30}$ )                           | -0.001                                          | 0.003**                                                    |
| Predictors of list x value                              |                                                 |                                                            |
| Cond1: TM v. PT ( $\beta_{31}$ )                        | 0.001                                           | < 0.0001                                                   |
| Cond2: TM v. 1back ( $\beta_{32}$ )                     | -0.0003                                         | -0.002                                                     |
| <b>Random effects</b>                                   | <b>Variance</b>                                 | <b>Variance</b>                                            |
| Intercept (person-level) ( $r_0$ )                      | 0.03***                                         | 0.01***                                                    |
| Value ( $r_1$ )                                         | < 0.0001                                        | < 0.0001                                                   |
| List ( $r_2$ )                                          | 0.002***                                        | 0.0004***                                                  |
| List x Value ( $r_3$ )                                  | < 0.0001                                        | < 0.0001                                                   |

*Note.* Level 1 models were of the form  $\eta_{ij} = \pi_{0j} + \pi_{1j}(\text{Value}) + \pi_{2j}(\text{List}) + \pi_{3j}(\text{List x Value})$ . Level 2 models were of the form  $\pi_{0j} = \beta_{00} + \beta_{01}(\text{Cond1}) + \beta_{02}(\text{Cond2}) + r_{0j}$ ,  $\pi_{1j} = \beta_{10} + \beta_{11}(\text{Cond1}) + \beta_{12}(\text{Cond2}) + r_{1j}$ ,  $\pi_{2j} = \beta_{20} + \beta_{21}(\text{Cond1}) + \beta_{22}(\text{Cond2}) + r_{2j}$ ,  $\pi_{3j} = \beta_{30} + \beta_{31}(\text{Cond1}) + \beta_{32}(\text{Cond2}) + r_{3j}$ .

“TM” refers to the Tone monitoring condition and “PT” to Paired tones.

\* $p < .05$  \*\* $p < .01$  \*\*\* $p < .001$
